# Supplementary material for: Remnants of the Legume Ancestral Genome Preserved in Gene-Rich Regions: Insights from Lupinus angustifolius Physical, Genetic, and Comparative Mapping
Source: PubMed Central journal article supplement (PMC4295026; doi:10.1007/s11105-014-0730-4), 2014-05-15
Supplement: 11105_2014_730_MOESM7_ESM.pdf [file 11105_2014_730_MOESM7_ESM.pdf]

| Accessions |        |         |        | Marker data                           |                       |                                    |                                   |                    |                           |                           |                        |                        |                       |               |           |    |    |    | Segregation data ("0" = no polymorphism, "1" = genotype 83A/476, "2" = genotype P27255, "H" = heterozygote) |    |    |    |    |    |    |     |     |     |     |     |     |     |     |     |     |     |     |     |     |     |     |     |     |     |     |     |     |     |     |     |     |     |     |     |     |     |     |     |     |     |     |     |     |     |     |     |     |     |     |     |     |     |     |     |     |     |     |     |     |     |     |     |     |     |     |     |     |     |     |     |     |     |     |     |     |     |     |     |     |     |     |     |     |     |     |     |     |     |     |     |     |     |     |     |     |      |      |      |      |      |      |      |      |      |      |      |      |      |      |      |      |      |      |      |      |      |      |      |      |      |      |      |      |      |      |      |      |      |      |      |      |      |      |      |      |      |      |      |      |      |      |      |      |      |      |      |      |      |      |      |      |      |      |      |      |      |      |      |      |      |      |      |      |      |      |      |      |      |      |      |      |      |      |      |      |      |      |      |      |      |      |      |      |      |      |      |      |      |      |      |      |      |      |      |      |      |      |      |      |      |      |      |      |      |      |      |      |      |      |      |      |      |      |      |      |      |      |      |      |      |      |      |      |      |      |      |      |      |      |      |      |      |      |      |      |      |      |      |      |      |      |      |      |      |      |      |      |      |      |      |      |      |      |      |      |      |      |      |      |      |      |      |      |      |      |      |      |      |      |      |      |      |      |      |      |      |      |      |      |      |      |      |      |      |      |      |      |      |      |      |      |      |      |      |      |      |      |      |      |      |      |      |      |      |      |      |      |      |      |      |      |      |      |      |      |      |      |      |      |      |      |      |      |      |      |      |      |      |      |      |      |      |      |      |      |      |      |      |      |      |      |      |      |      |      |      |      |      |      |      |      |      |      |      |      |      |      |      |      |      |      |      |      |      |      |      |      |      |      |      |      |      |      |      |      |      |      |      |      |      |      |      |      |      |      |      |      |      |      |      |      |      |      |      |      |      |      |      |      |      |      |      |      |      |      |      |      |      |      |      |      |      |      |      |      |      |      |      |      |      |      |      |      |      |      |      |      |      |      |      |      |      |      |      |      |      |      |      |      |      |      |      |      |      |      |      |      |      |      |      |      |      |      |      |      |      |      |      |      |      |      |      |      |      |      |      |      |      |      |      |      |      |      |      |      |      |      |      |      |      |      |      |      |      |      |      |      |      |      |      |      |      |      |      |      |      |      |      |      |      |      |      |      |      |      |      |      |      |      |      |      |      |      |      |      |      |      |      |      |      |      |      |      |      |      |      |      |      |      |      |      |      |      |      |      |      |      |      |      |      |      |      |      |      |      |      |      |      |      |      |      |      |      |      |      |      |      |      |      |      |      |      |      |      |      |      |      |      |      |      |      |      |      |      |      |      |      |      |      |      |      |      |      |      |      |      |      |      |      |      |      |      |      |      |      |      |      |      |      |      |      |      |      |      |      |      |      |      |      |      |      |      |      |      |      |      |      |      |      |      |      |      |      |      |      |      |      |      |      |      |      |      |      |      |      |      |      |      |      |      |      |      |      |      |      |      |      |      |      |      |      |      |      |      |      |      |      |      |      |      |      |      |      |      |      |      |      |      |      |      |      |      |      |      |      |      |      |      |      |      |      |      |      |      |      |      |      |      |      |      |      |      |      |      |      |      |      |      |      |      |      |      |      |      |      |      |      |      |      |      |      |      |      |      |      |      |      |      |      |      |      |      |      |      |      |      |      |      |      |      |      |      |      |      |      |      |      |      |      |      |      |      |      |      |      |      |      |      |      |      |      |      |      |      |      |      |      |      |      |      |      |      |      |      |      |      |      |      |      |      |      |      |      |      |      |      |      |      |      |      |      |      |      |      |      |      |      |      |      |      |      |      |      |      |      |      |      |      |      |      |      |      |      |      |      |      |      |      |      |      |      |      |      |      |      |      |      |      |      |      |      |      |      |      |      |      |      |      |      |      |      |      |      |      |      |      |      |      |      |      |      |      |      |      |      |      |      |      |      |      |      |      |      |      |      |      |      |      |      |      |      |      |      |      |      |      |      |      |      |      |      |      |      |      |      |      |      |      |      |      |      |      |      |      |      |      |      |      |      |      |      |      |      |      |      |      |      |      |      |      |      |      |      |      |      |      |      |      |      |      |      |      |      |      |      |      |      |      |      |      |      |      |      |      |      |      |      |      |      |      |      |      |      |      |      |      |      |      |      |      |      |      |      |      |      |      |      |      |      |      |      |      |      |      |      |      |      |      |      |      |      |      |      |      |      |      |      |      |      |      |      |      |      |      |      |      |      |      |      |      |      |      |      |      |      |      |      |      |      |      |      |      |      |      |      |       |       |       |       |       |       |       |       |       |       |       |       |       |       |       |       |       |       |       |       |       |       |       |       |       |       |       |       |       |       |       |       |       |       |       |       |       |       |       |       |       |       |       |       |       |       |       |       |       |       |       |       |       |       |       |       |       |       |       |       |       |       |       |       |       |       |       |       |       |       |       |       |       |       |       |       |       |       |       |       |       |       |       |       |       |       |       |       |       |       |       |       |       |       |       |       |       |       |       |       |       |       |       |       |       |       |       |       |       |       |       |       |       |       |       |       |       |       |       |       |       |       |       |       |       |       |       |       |       |       |       |       |       |       |       |       |       |       |       |       |       |       |       |       |       |       |       |       |       |       |       |       |       |       |       |       |       |       |       |       |       |       |       |       |       |       |       |       |       |       |       |       |       |       |       |       |       |       |       |       |       |       |       |       |       |       |       |       |       |       |       |       |       |       |       |       |       |       |       |       |       |       |       |       |       |       |       |       |       |       |       |       |       |       |       |       |       |       |       |       |       |       |       |       |       |       |       |       |       |       |       |       |       |       |       |       |       |       |       |       |       |       |       |       |       |       |       |       |       |       |       |       |       |       |       |       |       |       |       |       |       |       |       |       |       |       |       |       |       |       |       |       |       |       |       |       |       |       |       |       |       |       |       |       |       |       |       |       |       |       |       |       |       |       |       |       |       |       |       |       |       |       |       |       |       |       |       |       |       |       |       |       |   |
|------------|--------|---------|--------|---------------------------------------|-----------------------|------------------------------------|-----------------------------------|--------------------|---------------------------|---------------------------|------------------------|------------------------|-----------------------|---------------|-----------|----|----|----|-------------------------------------------------------------------------------------------------------------|----|----|----|----|----|----|-----|-----|-----|-----|-----|-----|-----|-----|-----|-----|-----|-----|-----|-----|-----|-----|-----|-----|-----|-----|-----|-----|-----|-----|-----|-----|-----|-----|-----|-----|-----|-----|-----|-----|-----|-----|-----|-----|-----|-----|-----|-----|-----|-----|-----|-----|-----|-----|-----|-----|-----|-----|-----|-----|-----|-----|-----|-----|-----|-----|-----|-----|-----|-----|-----|-----|-----|-----|-----|-----|-----|-----|-----|-----|-----|-----|-----|-----|-----|-----|-----|-----|-----|-----|-----|-----|-----|-----|-----|-----|------|------|------|------|------|------|------|------|------|------|------|------|------|------|------|------|------|------|------|------|------|------|------|------|------|------|------|------|------|------|------|------|------|------|------|------|------|------|------|------|------|------|------|------|------|------|------|------|------|------|------|------|------|------|------|------|------|------|------|------|------|------|------|------|------|------|------|------|------|------|------|------|------|------|------|------|------|------|------|------|------|------|------|------|------|------|------|------|------|------|------|------|------|------|------|------|------|------|------|------|------|------|------|------|------|------|------|------|------|------|------|------|------|------|------|------|------|------|------|------|------|------|------|------|------|------|------|------|------|------|------|------|------|------|------|------|------|------|------|------|------|------|------|------|------|------|------|------|------|------|------|------|------|------|------|------|------|------|------|------|------|------|------|------|------|------|------|------|------|------|------|------|------|------|------|------|------|------|------|------|------|------|------|------|------|------|------|------|------|------|------|------|------|------|------|------|------|------|------|------|------|------|------|------|------|------|------|------|------|------|------|------|------|------|------|------|------|------|------|------|------|------|------|------|------|------|------|------|------|------|------|------|------|------|------|------|------|------|------|------|------|------|------|------|------|------|------|------|------|------|------|------|------|------|------|------|------|------|------|------|------|------|------|------|------|------|------|------|------|------|------|------|------|------|------|------|------|------|------|------|------|------|------|------|------|------|------|------|------|------|------|------|------|------|------|------|------|------|------|------|------|------|------|------|------|------|------|------|------|------|------|------|------|------|------|------|------|------|------|------|------|------|------|------|------|------|------|------|------|------|------|------|------|------|------|------|------|------|------|------|------|------|------|------|------|------|------|------|------|------|------|------|------|------|------|------|------|------|------|------|------|------|------|------|------|------|------|------|------|------|------|------|------|------|------|------|------|------|------|------|------|------|------|------|------|------|------|------|------|------|------|------|------|------|------|------|------|------|------|------|------|------|------|------|------|------|------|------|------|------|------|------|------|------|------|------|------|------|------|------|------|------|------|------|------|------|------|------|------|------|------|------|------|------|------|------|------|------|------|------|------|------|------|------|------|------|------|------|------|------|------|------|------|------|------|------|------|------|------|------|------|------|------|------|------|------|------|------|------|------|------|------|------|------|------|------|------|------|------|------|------|------|------|------|------|------|------|------|------|------|------|------|------|------|------|------|------|------|------|------|------|------|------|------|------|------|------|------|------|------|------|------|------|------|------|------|------|------|------|------|------|------|------|------|------|------|------|------|------|------|------|------|------|------|------|------|------|------|------|------|------|------|------|------|------|------|------|------|------|------|------|------|------|------|------|------|------|------|------|------|------|------|------|------|------|------|------|------|------|------|------|------|------|------|------|------|------|------|------|------|------|------|------|------|------|------|------|------|------|------|------|------|------|------|------|------|------|------|------|------|------|------|------|------|------|------|------|------|------|------|------|------|------|------|------|------|------|------|------|------|------|------|------|------|------|------|------|------|------|------|------|------|------|------|------|------|------|------|------|------|------|------|------|------|------|------|------|------|------|------|------|------|------|------|------|------|------|------|------|------|------|------|------|------|------|------|------|------|------|------|------|------|------|------|------|------|------|------|------|------|------|------|------|------|------|------|------|------|------|------|------|------|------|------|------|------|------|------|------|------|------|------|------|------|------|------|------|------|------|------|------|------|------|------|------|------|------|------|------|------|------|------|------|------|------|------|------|------|------|------|------|------|------|------|------|------|------|------|------|------|------|------|------|------|------|------|------|------|------|------|------|------|------|------|------|------|------|------|------|------|------|------|------|------|------|------|------|------|------|------|------|------|------|------|------|------|------|------|------|------|------|------|------|------|------|------|------|------|------|------|------|------|------|------|------|------|------|------|------|------|------|------|------|------|------|------|------|------|------|------|------|------|------|------|------|------|------|------|------|------|------|------|------|------|------|------|------|------|------|------|------|------|------|------|------|------|------|------|------|------|------|------|------|------|------|------|------|------|------|------|------|------|------|------|------|------|------|------|------|------|------|------|------|------|------|------|------|------|------|------|------|------|------|------|------|------|------|------|------|------|------|------|------|------|------|------|------|------|------|------|------|------|------|------|------|------|------|------|------|------|-------|-------|-------|-------|-------|-------|-------|-------|-------|-------|-------|-------|-------|-------|-------|-------|-------|-------|-------|-------|-------|-------|-------|-------|-------|-------|-------|-------|-------|-------|-------|-------|-------|-------|-------|-------|-------|-------|-------|-------|-------|-------|-------|-------|-------|-------|-------|-------|-------|-------|-------|-------|-------|-------|-------|-------|-------|-------|-------|-------|-------|-------|-------|-------|-------|-------|-------|-------|-------|-------|-------|-------|-------|-------|-------|-------|-------|-------|-------|-------|-------|-------|-------|-------|-------|-------|-------|-------|-------|-------|-------|-------|-------|-------|-------|-------|-------|-------|-------|-------|-------|-------|-------|-------|-------|-------|-------|-------|-------|-------|-------|-------|-------|-------|-------|-------|-------|-------|-------|-------|-------|-------|-------|-------|-------|-------|-------|-------|-------|-------|-------|-------|-------|-------|-------|-------|-------|-------|-------|-------|-------|-------|-------|-------|-------|-------|-------|-------|-------|-------|-------|-------|-------|-------|-------|-------|-------|-------|-------|-------|-------|-------|-------|-------|-------|-------|-------|-------|-------|-------|-------|-------|-------|-------|-------|-------|-------|-------|-------|-------|-------|-------|-------|-------|-------|-------|-------|-------|-------|-------|-------|-------|-------|-------|-------|-------|-------|-------|-------|-------|-------|-------|-------|-------|-------|-------|-------|-------|-------|-------|-------|-------|-------|-------|-------|-------|-------|-------|-------|-------|-------|-------|-------|-------|-------|-------|-------|-------|-------|-------|-------|-------|-------|-------|-------|-------|-------|-------|-------|-------|-------|-------|-------|-------|-------|-------|-------|-------|-------|-------|-------|-------|-------|-------|-------|-------|-------|-------|-------|-------|-------|-------|-------|-------|-------|-------|-------|-------|-------|-------|-------|-------|-------|-------|-------|-------|-------|-------|-------|-------|-------|-------|-------|-------|-------|-------|-------|-------|-------|-------|-------|-------|-------|-------|-------|-------|-------|-------|-------|-------|-------|-------|-------|-------|-------|-------|-------|-------|-------|-------|-------|-------|---|
| Marker     | Contig | 83A/476 | P27255 | Primer pair sequences (dCAPS primers) | Annealing temperature | PCR product length for 83A/476 DNA | PCR product length for P27255 DNA | PCR product length | 83A/476 sequence identity | 83A/476 sequence identity | Polymorphism detection | 83A/476 product length | P27255 product length | Linkage group | LOD score | W0 | W1 | W2 | W3                                                                                                          | W4 | W5 | W6 | W7 | W8 | W9 | W10 | W11 | W12 | W13 | W14 | W15 | W16 | W17 | W18 | W19 | W20 | W21 | W22 | W23 | W24 | W25 | W26 | W27 | W28 | W29 | W30 | W31 | W32 | W33 | W34 | W35 | W36 | W37 | W38 | W39 | W40 | W41 | W42 | W43 | W44 | W45 | W46 | W47 | W48 | W49 | W50 | W51 | W52 | W53 | W54 | W55 | W56 | W57 | W58 | W59 | W60 | W61 | W62 | W63 | W64 | W65 | W66 | W67 | W68 | W69 | W70 | W71 | W72 | W73 | W74 | W75 | W76 | W77 | W78 | W79 | W80 | W81 | W82 | W83 | W84 | W85 | W86 | W87 | W88 | W89 | W90 | W91 | W92 | W93 | W94 | W95 | W96 | W97 | W98 | W99 | W100 | W101 | W102 | W103 | W104 | W105 | W106 | W107 | W108 | W109 | W110 | W111 | W112 | W113 | W114 | W115 | W116 | W117 | W118 | W119 | W120 | W121 | W122 | W123 | W124 | W125 | W126 | W127 | W128 | W129 | W130 | W131 | W132 | W133 | W134 | W135 | W136 | W137 | W138 | W139 | W140 | W141 | W142 | W143 | W144 | W145 | W146 | W147 | W148 | W149 | W150 | W151 | W152 | W153 | W154 | W155 | W156 | W157 | W158 | W159 | W160 | W161 | W162 | W163 | W164 | W165 | W166 | W167 | W168 | W169 | W170 | W171 | W172 | W173 | W174 | W175 | W176 | W177 | W178 | W179 | W180 | W181 | W182 | W183 | W184 | W185 | W186 | W187 | W188 | W189 | W190 | W191 | W192 | W193 | W194 | W195 | W196 | W197 | W198 | W199 | W200 | W201 | W202 | W203 | W204 | W205 | W206 | W207 | W208 | W209 | W210 | W211 | W212 | W213 | W214 | W215 | W216 | W217 | W218 | W219 | W220 | W221 | W222 | W223 | W224 | W225 | W226 | W227 | W228 | W229 | W230 | W231 | W232 | W233 | W234 | W235 | W236 | W237 | W238 | W239 | W240 | W241 | W242 | W243 | W244 | W245 | W246 | W247 | W248 | W249 | W250 | W251 | W252 | W253 | W254 | W255 | W256 | W257 | W258 | W259 | W260 | W261 | W262 | W263 | W264 | W265 | W266 | W267 | W268 | W269 | W270 | W271 | W272 | W273 | W274 | W275 | W276 | W277 | W278 | W279 | W280 | W281 | W282 | W283 | W284 | W285 | W286 | W287 | W288 | W289 | W290 | W291 | W292 | W293 | W294 | W295 | W296 | W297 | W298 | W299 | W300 | W301 | W302 | W303 | W304 | W305 | W306 | W307 | W308 | W309 | W310 | W311 | W312 | W313 | W314 | W315 | W316 | W317 | W318 | W319 | W320 | W321 | W322 | W323 | W324 | W325 | W326 | W327 | W328 | W329 | W330 | W331 | W332 | W333 | W334 | W335 | W336 | W337 | W338 | W339 | W340 | W341 | W342 | W343 | W344 | W345 | W346 | W347 | W348 | W349 | W350 | W351 | W352 | W353 | W354 | W355 | W356 | W357 | W358 | W359 | W360 | W361 | W362 | W363 | W364 | W365 | W366 | W367 | W368 | W369 | W370 | W371 | W372 | W373 | W374 | W375 | W376 | W377 | W378 | W379 | W380 | W381 | W382 | W383 | W384 | W385 | W386 | W387 | W388 | W389 | W390 | W391 | W392 | W393 | W394 | W395 | W396 | W397 | W398 | W399 | W400 | W401 | W402 | W403 | W404 | W405 | W406 | W407 | W408 | W409 | W410 | W411 | W412 | W413 | W414 | W415 | W416 | W417 | W418 | W419 | W420 | W421 | W422 | W423 | W424 | W425 | W426 | W427 | W428 | W429 | W430 | W431 | W432 | W433 | W434 | W435 | W436 | W437 | W438 | W439 | W440 | W441 | W442 | W443 | W444 | W445 | W446 | W447 | W448 | W449 | W450 | W451 | W452 | W453 | W454 | W455 | W456 | W457 | W458 | W459 | W460 | W461 | W462 | W463 | W464 | W465 | W466 | W467 | W468 | W469 | W470 | W471 | W472 | W473 | W474 | W475 | W476 | W477 | W478 | W479 | W480 | W481 | W482 | W483 | W484 | W485 | W486 | W487 | W488 | W489 | W490 | W491 | W492 | W493 | W494 | W495 | W496 | W497 | W498 | W499 | W500 | W501 | W502 | W503 | W504 | W505 | W506 | W507 | W508 | W509 | W510 | W511 | W512 | W513 | W514 | W515 | W516 | W517 | W518 | W519 | W520 | W521 | W522 | W523 | W524 | W525 | W526 | W527 | W528 | W529 | W530 | W531 | W532 | W533 | W534 | W535 | W536 | W537 | W538 | W539 | W540 | W541 | W542 | W543 | W544 | W545 | W546 | W547 | W548 | W549 | W550 | W551 | W552 | W553 | W554 | W555 | W556 | W557 | W558 | W559 | W560 | W561 | W562 | W563 | W564 | W565 | W566 | W567 | W568 | W569 | W570 | W571 | W572 | W573 | W574 | W575 | W576 | W577 | W578 | W579 | W580 | W581 | W582 | W583 | W584 | W585 | W586 | W587 | W588 | W589 | W590 | W591 | W592 | W593 | W594 | W595 | W596 | W597 | W598 | W599 | W600 | W601 | W602 | W603 | W604 | W605 | W606 | W607 | W608 | W609 | W610 | W611 | W612 | W613 | W614 | W615 | W616 | W617 | W618 | W619 | W620 | W621 | W622 | W623 | W624 | W625 | W626 | W627 | W628 | W629 | W630 | W631 | W632 | W633 | W634 | W635 | W636 | W637 | W638 | W639 | W640 | W641 | W642 | W643 | W644 | W645 | W646 | W647 | W648 | W649 | W650 | W651 | W652 | W653 | W654 | W655 | W656 | W657 | W658 | W659 | W660 | W661 | W662 | W663 | W664 | W665 | W666 | W667 | W668 | W669 | W670 | W671 | W672 | W673 | W674 | W675 | W676 | W677 | W678 | W679 | W680 | W681 | W682 | W683 | W684 | W685 | W686 | W687 | W688 | W689 | W690 | W691 | W692 | W693 | W694 | W695 | W696 | W697 | W698 | W699 | W700 | W701 | W702 | W703 | W704 | W705 | W706 | W707 | W708 | W709 | W710 | W711 | W712 | W713 | W714 | W715 | W716 | W717 | W718 | W719 | W720 | W721 | W722 | W723 | W724 | W725 | W726 | W727 | W728 | W729 | W730 | W731 | W732 | W733 | W734 | W735 | W736 | W737 | W738 | W739 | W740 | W741 | W742 | W743 | W744 | W745 | W746 | W747 | W748 | W749 | W750 | W751 | W752 | W753 | W754 | W755 | W756 | W757 | W758 | W759 | W760 | W761 | W762 | W763 | W764 | W765 | W766 | W767 | W768 | W769 | W770 | W771 | W772 | W773 | W774 | W775 | W776 | W777 | W778 | W779 | W780 | W781 | W782 | W783 | W784 | W785 | W786 | W787 | W788 | W789 | W790 | W791 | W792 | W793 | W794 | W795 | W796 | W797 | W798 | W799 | W800 | W801 | W802 | W803 | W804 | W805 | W806 | W807 | W808 | W809 | W810 | W811 | W812 | W813 | W814 | W815 | W816 | W817 | W818 | W819 | W820 | W821 | W822 | W823 | W824 | W825 | W826 | W827 | W828 | W829 | W830 | W831 | W832 | W833 | W834 | W835 | W836 | W837 | W838 | W839 | W840 | W841 | W842 | W843 | W844 | W845 | W846 | W847 | W848 | W849 | W850 | W851 | W852 | W853 | W854 | W855 | W856 | W857 | W858 | W859 | W860 | W861 | W862 | W863 | W864 | W865 | W866 | W867 | W868 | W869 | W870 | W871 | W872 | W873 | W874 | W875 | W876 | W877 | W878 | W879 | W880 | W881 | W882 | W883 | W884 | W885 | W886 | W887 | W888 | W889 | W890 | W891 | W892 | W893 | W894 | W895 | W896 | W897 | W898 | W899 | W900 | W901 | W902 | W903 | W904 | W905 | W906 | W907 | W908 | W909 | W910 | W911 | W912 | W913 | W914 | W915 | W916 | W917 | W918 | W919 | W920 | W921 | W922 | W923 | W924 | W925 | W926 | W927 | W928 | W929 | W930 | W931 | W932 | W933 | W934 | W935 | W936 | W937 | W938 | W939 | W940 | W941 | W942 | W943 | W944 | W945 | W946 | W947 | W948 | W949 | W950 | W951 | W952 | W953 | W954 | W955 | W956 | W957 | W958 | W959 | W960 | W961 | W962 | W963 | W964 | W965 | W966 | W967 | W968 | W969 | W970 | W971 | W972 | W973 | W974 | W975 | W976 | W977 | W978 | W979 | W980 | W981 | W982 | W983 | W984 | W985 | W986 | W987 | W988 | W989 | W990 | W991 | W992 | W993 | W994 | W995 | W996 | W997 | W998 | W999 | W1000 | W1001 | W1002 | W1003 | W1004 | W1005 | W1006 | W1007 | W1008 | W1009 | W1010 | W1011 | W1012 | W1013 | W1014 | W1015 | W1016 | W1017 | W1018 | W1019 | W1020 | W1021 | W1022 | W1023 | W1024 | W1025 | W1026 | W1027 | W1028 | W1029 | W1030 | W1031 | W1032 | W1033 | W1034 | W1035 | W1036 | W1037 | W1038 | W1039 | W1040 | W1041 | W1042 | W1043 | W1044 | W1045 | W1046 | W1047 | W1048 | W1049 | W1050 | W1051 | W1052 | W1053 | W1054 | W1055 | W1056 | W1057 | W1058 | W1059 | W1060 | W1061 | W1062 | W1063 | W1064 | W1065 | W1066 | W1067 | W1068 | W1069 | W1070 | W1071 | W1072 | W1073 | W1074 | W1075 | W1076 | W1077 | W1078 | W1079 | W1080 | W1081 | W1082 | W1083 | W1084 | W1085 | W1086 | W1087 | W1088 | W1089 | W1090 | W1091 | W1092 | W1093 | W1094 | W1095 | W1096 | W1097 | W1098 | W1099 | W1100 | W1101 | W1102 | W1103 | W1104 | W1105 | W1106 | W1107 | W1108 | W1109 | W1110 | W1111 | W1112 | W1113 | W1114 | W1115 | W1116 | W1117 | W1118 | W1119 | W1120 | W1121 | W1122 | W1123 | W1124 | W1125 | W1126 | W1127 | W1128 | W1129 | W1130 | W1131 | W1132 | W1133 | W1134 | W1135 | W1136 | W1137 | W1138 | W1139 | W1140 | W1141 | W1142 | W1143 | W1144 | W1145 | W1146 | W1147 | W1148 | W1149 | W1150 | W1151 | W1152 | W1153 | W1154 | W1155 | W1156 | W1157 | W1158 | W1159 | W1160 | W1161 | W1162 | W1163 | W1164 | W1165 | W1166 | W1167 | W1168 | W1169 | W1170 | W1171 | W1172 | W1173 | W1174 | W1175 | W1176 | W1177 | W1178 | W1179 | W1180 | W1181 | W1182 | W1183 | W1184 | W1185 | W1186 | W1187 | W1188 | W1189 | W1190 | W1191 | W1192 | W1193 | W1194 | W1195 | W1196 | W1197 | W1198 | W1199 | W1200 | W1201 | W1202 | W1203 | W1204 | W1205 | W1206 | W1207 | W1208 | W1209 | W1210 | W1211 | W1212 | W1213 | W1214 | W1215 | W1216 | W1217 | W1218 | W1219 | W1220 | W1221 | W1222 | W1223 | W1224 | W1225 | W1226 | W1227 | W1228 | W1229 | W1230 | W1231 | W1232 | W1233 | W1234 | W1235 | W1236 | W1237 | W1238 | W1239 | W1240 | W1241 | W1242 | W1243 | W1244 | W1245 | W1246 | W1247 | W1248 | W1249 | W1250 | W1251 | W1252 | W1253 | W1254 | W1255 | W1256 | W1257 | W1258 | W1259 | W1260 | W1261 | W1262 | W1263 | W1264 | W1265 | W1266 | W1267 | W1268 | W1269 | W1270 | W1271 | W1272 | W1273 | W1274 | W1275 | W1276 | W1277 | W1278 | W1279 | W1280 | W1281 | W1282 | W1283 | W1284 | W1285 | W1286 | W1287 | W1288 | W1289 | W1290 | W1291 | W1292 | W1293 | W1294 | W1295 | W1296 | W1297 | W1298 | W1299 | W1300 | W1301 | W1302 | W1303 | W1304 | W1305 | W1306 | W1307 | W1308 | W1309 | W1310 | W1311 | W |
